# Supplementary material for: The Reverse Transcription Inhibitor Abacavir Shows Anticancer Activity in Prostate Cancer Cell Lines
Source: PLoS One. 2010 Dec 3;5(12):e14221. doi: 10.1371/journal.pone.0014221 (PMC2997057; doi:10.1371/journal.pone.0014221)
Supplement: Table S5 — List of the common differentially expressed genes at 15 and 150 µM ABC in PC3 cells. (0.08 MB XLS) [file pone.0014221.s005.xls]

## Sheet: Foglio1
SYMBOL	Fold Difference 15 µM ABC	Fold Difference 150 µM ABC	GID	ACCESSION	DEFINITION	ONTOLOGY	SYNONYM
ACTA2	1.38	4.37	4501882	NM_001613.1	Homo sapiens actin, alpha 2, smooth muscle, aorta (ACTA2), mRNA.	muscle development [goid 7517] [evidence IEA]; nucleotide binding [goid 166] [evidence IEA]; protein binding [goid 5515] [evidence IEA]; ATP binding [goid 5524] [evidence IEA]; structural constituent of cytoskeleton [goid 5200] [evidence IEA]; motor activ	ACTSA
ADM	1.27	3.26	4501944	NM_001124.1	Homo sapiens adrenomedullin (ADM), mRNA.	cell-cell signaling [goid 7267] [pmid 8074714] [evidence TAS]; response to wounding [goid 9611] [pmid 8524787] [evidence TAS]; signal transduction [goid 7165] [pmid 10822232] [evidence TAS]; cAMP biosynthesis [goid 6171] [pmid 8074714] [evidence TAS]; pre	AM
AEBP1	1.23	-1.31	53692188	NM_001129.3	Homo sapiens AE binding protein 1 (AEBP1), mRNA.	skeletal development [goid 1501] [pmid 8920928] [evidence TAS]; cell adhesion [goid 7155] [evidence IEA]; muscle development [goid 7517] [pmid 9624159] [evidence TAS]; proteolysis and peptidolysis [goid 6508] [evidence IEA]; carboxypeptidase A activity [g	ACLP
AHCTF1	1.23	1.79	67551264	NM_015446.3	Homo sapiens AT hook containing transcription factor 1 (AHCTF1), mRNA.		ELYS; MST108; TMBS62; MSTP108; DKFZp434N093
AHNAK	-1.29	-3.78	55769540	NM_024060.2	Homo sapiens AHNAK nucleoprotein (desmoyokin) (AHNAK), transcript variant 2, mRNA.	neurogenesis [goid 7399] [evidence NAS]; protein binding [goid 5515] [evidence IEA]; nucleus [goid 5634] [pmid 1608957] [evidence NAS]	AHNAKRS; MGC5395
ANAPC5	1.16	1.26	34147585	NM_016237.3	Homo sapiens anaphase promoting complex subunit 5 (ANAPC5), mRNA.	G2/M transition of mitotic cell cycle [goid 86] [pmid 9469815] [evidence TAS]; cell division [goid 51301] [evidence IEA]; ubiquitin-dependent protein catabolism [goid 6511] [pmid 9469815] [evidence TAS]; regulation of cell cycle [goid 74] [pmid 9469815] [	APC5; PDL-108
AP1S1	-1.38	-1.46	16950626	NM_001283.2	Homo sapiens adaptor-related protein complex 1, sigma 1 subunit (AP1S1), transcript variant 1, mRNA.	intracellular protein transport [goid 6886] [evidence ISS]; receptor mediated endocytosis [goid 6898] [pmid 9733768] [evidence TAS]; protein transporter activity [goid 8565] [evidence ISS]; protein binding [goid 5515] [evidence ISS]; coated pit [goid 5905	AP19; CLAPS1; SIGMA1A
AP3M2	1.25	1.53	14916518	NM_006803.2	Homo sapiens adaptor-related protein complex 3, mu 2 subunit (AP3M2), mRNA.	intracellular protein transport [goid 6886] [evidence IEA]; clathrin vesicle coat [goid 30125] [evidence IEA]; membrane coat adaptor complex [goid 30119] [pmid 8076832] [evidence TAS]; Golgi stack [goid 5795] [evidence IEA]	P47B; AP47B; CLA20
APAF1	1.25	1.57	32483362	NM_181869.1	Homo sapiens apoptotic peptidase activating factor (APAF1), transcript variant 5, mRNA.	neurogenesis [goid 7399] [pmid 9753320] [evidence TAS]; regulation of apoptosis [goid 42981] [pmid 10441496] [evidence TAS]; caspase activation via cytochrome c [goid 8635] [pmid 9267021] [evidence IDA]; nucleotide binding [goid 166] [pmid 10383829] [evid	CED4
BANF1	-1.37	-1.38	11038645	NM_003860.2	Homo sapiens barrier to autointegration factor 1 (BANF1), mRNA.	response to virus [goid 9615] [pmid 9465049] [evidence TAS]; DNA binding [goid 3677] [evidence IEA]; chromosome [goid 5694] [evidence IEA]; nucleus [goid 5634] [evidence IEA]	BAF; BCRP1; D14S1460; MGC111161
C10orf132	1.65	2.46	58219039	NM_001010917.1	Homo sapiens chromosome 10 open reading frame 132 (C10orf132), mRNA.		MGC131701; bA459F3.4
C10orf90	1.38	1.63	52145311	NM_001004298.2	Homo sapiens chromosome 10 open reading frame 90 (C10orf90), mRNA.		FLJ32938; bA422P15.2; RP11-422P15.2
C19orf28	1.45	-1.16	34222225	NM_174983.2	Homo sapiens chromosome 19 open reading frame 28 (C19orf28), mRNA.		PP3501; MGC20700
C20orf11	1.23	1.45	40804466	NM_017896.2	Homo sapiens chromosome 20 open reading frame 11 (C20orf11), mRNA.	nucleus [goid 5634] [evidence IEA]	TWA1
C9orf123	1.27	1.44	62955828	NM_033428.1	Homo sapiens chromosome 9 open reading frame 123 (C9orf123), mRNA.	membrane [goid 16020] [evidence IEA]; integral to membrane [goid 16021] [evidence IEA]	MGC4730
C9orf9	-1.18	-1.89	33285005	NM_018956.3	Homo sapiens chromosome 9 open reading frame 9 (C9orf9), mRNA.
CALB2	-1.41	-4.77	6031158	NM_001740.2	Homo sapiens calbindin 2, 29kDa (calretinin) (CALB2), transcript variant CALB2, mRNA.	calcium ion binding [goid 5509] [evidence IEA]	CAL2
CAPS	-1.21	-1.54	18104963	NM_080590.1	Homo sapiens calcyphosine (CAPS), transcript variant 2, mRNA.	intracellular signaling cascade [goid 7242] [pmid 2540953] [evidence TAS]; calcium ion binding [goid 5509] [pmid 2540953] [evidence TAS]	CAPS1
CBX6	1.27	1.57	46852391	NM_014292.3	Homo sapiens chromobox homolog 6 (CBX6), mRNA.	regulation of transcription, DNA-dependent [goid 6355] [evidence IEA]; transcription [goid 6350] [evidence IEA]; chromatin assembly or disassembly [goid 6333] [evidence IEA]; chromatin modification [goid 16568] [evidence IEA]; chromatin binding [goid 3682
CDCA7	1.28	1.59	22027513	NM_145810.1	Homo sapiens cell division cycle associated 7 (CDCA7), transcript variant 2, mRNA.	metal ion binding [goid 46872] [evidence IEA]; oxidoreductase activity [goid 16491] [evidence IEA]; copper ion binding [goid 5507] [evidence IEA]	JPO1; FLJ14722; FLJ14736; MGC34109
CDH13	1.24	1.33	61676095	NM_001257.3	Homo sapiens cadherin 13, H-cadherin (heart) (CDH13), mRNA.	homophilic cell adhesion [goid 7156] [evidence IEA]; cell adhesion [goid 7155] [pmid 8673923] [evidence TAS]; calcium ion binding [goid 5509] [evidence IEA]; protein binding [goid 5515] [evidence IEA]; membrane [goid 16020] [evidence IEA]	CDHH
CDKN2C	-1.44	-2.27	17981698	NM_078626.1	Homo sapiens cyclin-dependent kinase inhibitor 2C (p18, inhibits CDK4) (CDKN2C), transcript variant 2, mRNA.	cell cycle arrest [goid 7050] [pmid 8001816] [evidence TAS]; negative regulation of cell proliferation [goid 8285] [pmid 8001816] [evidence TAS]; cell cycle [goid 7049] [evidence IEA]; cyclin-dependent protein kinase inhibitor activity [goid 4861] [pmid 8	p18; INK4C; p18-INK4C
CERK	1.2	1.25	32967302	NM_182661.1	Homo sapiens ceramide kinase (CERK), transcript variant 2, mRNA.	protein kinase C activation [goid 7205] [evidence IEA]; ceramide metabolism [goid 6672] [pmid 11956206] [evidence TAS]; transferase activity [goid 16740] [evidence IEA]; calcium- and calmodulin-dependent protein kinase activity [goid 4685] [pmid 11956206]	LK4; hCERK; FLJ21430; FLJ23239; KIAA1646; MGC131878; dA59H18.2; dA59H18.3; DKFZp434E0211
CHRM3	1.39	1.42	54792120	NM_000740.2	Homo sapiens cholinergic receptor, muscarinic 3 (CHRM3), mRNA.	cell proliferation [goid 8283] [pmid 8063729] [evidence TAS]; signal transduction [goid 7165] [pmid 10940357] [evidence TAS]; G-protein coupled receptor protein signaling pathway [goid 7186] [pmid 9603968] [evidence TAS]; neurogenesis [goid 7399] [pmid 27	HM3
CIITA	1.74	2.32	73747680	NM_000246.2	Homo sapiens class II, major histocompatibility complex, transactivator (CIITA), mRNA.	defense response to pathogen [goid 42829] [evidence IEA]; immune response [goid 6955] [pmid 8402893] [evidence TAS]; regulation of transcription, DNA-dependent [goid 6355] [evidence IEA]; detection of pest, pathogen or parasite [goid 9596] [pmid 8402893]	C2TA; MHC2TA; CIITA IV
CIT	1.21	1.51	32698687	NM_007174.1	Homo sapiens citron (rho-interacting, serine/threonine kinase 21) (CIT), mRNA.	cell cycle [goid 7049] [evidence IEA]; neurogenesis [goid 48699] [pmid 11086988] [evidence ISS]; cell division [goid 51301] [evidence IEA]; mitosis [goid 7067] [pmid 11086988] [evidence ISS]; intracellular signaling cascade [goid 7242] [evidence IEA]; pro	CRIK; STK21; KIAA0949
CITED1	-1.49	-14.05	20127458	NM_004143.2	Homo sapiens Cbp/p300-interacting transactivator, with Glu/Asp-rich carboxy-terminal domain, 1 (CITED1), mRNA.	regulation of transcription from RNA polymerase II promoter [goid 6357] [pmid 9434189] [evidence TAS]; regulation of transcription [goid 45449] [evidence IEA]; transcription factor activity [goid 3700] [pmid 9434189] [evidence TAS]; nucleus [goid 5634] [e	MSG1
CLASP1	1.21	1.61	31563536	NM_015282.1	Homo sapiens cytoplasmic linker associated protein 1 (CLASP1), mRNA.	negative regulation of microtubule depolymerization [goid 7026] [pmid 11290329] [evidence NAS]; binding [goid 5488] [evidence IEA]; microtubule binding [goid 8017] [pmid 11290329] [evidence NAS]; microtubule associated complex [goid 5875] [pmid 11290329]	MAST1; KIAA0622; DKFZp686D1968; DKFZp686H2039
COL4A3BP	1.6	1.6	5031716	NM_005713.1	Homo sapiens collagen, type IV, alpha 3 (Goodpasture antigen) binding protein (COL4A3BP), transcript variant 1, mRNA.	immune response [goid 6955] [pmid 11007769] [evidence NAS]; protein amino acid phosphorylation [goid 6468] [pmid 10212244] [evidence TAS]; protein serine/threonine kinase activity [goid 4674] [evidence IEA]; transferase activity [goid 16740] [evidence IEA	CERT; GPBP; CERTL; STARD11
COL8A1	-1.36	-8.8	32895367	NM_020351.2	Homo sapiens collagen, type VIII, alpha 1 (COL8A1), transcript variant 2, mRNA.	phosphate transport [goid 6817] [evidence IEA]; cell adhesion [goid 7155] [evidence IEA]; structural molecule activity [goid 5198] [evidence IEA]; protein binding [goid 5515] [evidence IEA]; extracellular matrix (sensu Metazoa) [goid 5578] [evidence IEA];	MGC9568
CRADD	-1.2	-1.4	51988883	NM_003805.3	Homo sapiens CASP2 and RIPK1 domain containing adaptor with death domain (CRADD), mRNA.	induction of apoptosis via death domain receptors [goid 8625] [pmid 9044836] [evidence TAS]; signal transduction [goid 7165] [evidence IEA]; regulation of apoptosis [goid 42981] [evidence IEA]; protein binding [goid 5515] [pmid 15073321] [evidence IPI]; i	RAIDD; MGC9163
CTPS	1.25	1.88	4503132	NM_001905.1	Homo sapiens CTP synthase (CTPS), mRNA.	nucleobase, nucleoside, nucleotide and nucleic acid metabolism [goid 6139] [pmid 2113467] [evidence TAS]; pyrimidine nucleotide biosynthesis [goid 6221] [evidence IEA]; response to drug [goid 42493] [pmid 7981751] [evidence TAS]; glutamine metabolism [goi
CYP1A1	2.57	2.22	13325053	NM_000499.2	Homo sapiens cytochrome P450, family 1, subfamily A, polypeptide 1 (CYP1A1), mRNA.	electron transport [goid 6118] [evidence IEA]; metal ion binding [goid 46872] [evidence IEA]; heme binding [goid 20037] [evidence IEA]; unspecific monooxygenase activity [goid 50381] [evidence IEA]; oxygen binding [goid 19825] [pmid 1691986] [evidence TAS	AHH; AHRR; CP11; CYP1; P1-450; P450-C; P450DX
DCC1	1.18	1.65	13129095	NM_024094.1	Homo sapiens defective in sister chromatid cohesion homolog 1 (S. cerevisiae) (DCC1), mRNA.		MGC5528
DDEFL1	1.16	-1.3	19923539	NM_017707.2	Homo sapiens development and differentiation enhancing factor-like 1 (DDEFL1), mRNA.	regulation of GTPase activity [goid 43087] [evidence IEA]; carboxylic acid metabolism [goid 19752] [evidence IEA]; transferase activity, transferring acyl groups, acyl groups converted into alkyl on transfer [goid 46912] [evidence IEA]	UPLC1; FLJ20199
DLX1	1.23	1.78	64225289	NM_178120.3	Homo sapiens distal-less homeo box 1 (DLX1), mRNA.	regulation of transcription, DNA-dependent [goid 6355] [evidence IEA]; development [goid 7275] [evidence NAS]; transcription factor activity [goid 3700] [evidence IEA]; nucleus [goid 5634] [evidence NAS]
DNAJB9	1.26	1.49	9558754	NM_012328.1	Homo sapiens DnaJ (Hsp40) homolog, subfamily B, member 9 (DNAJB9), mRNA.	protein folding [goid 6457] [evidence IEA]; chaperone regulator activity [goid 30188] [evidence ISS]; heat shock protein binding [goid 31072] [evidence IEA]; unfolded protein binding [goid 51082] [evidence IEA]; nucleolus [goid 5730] [evidence ISS]; cytop	MDG1; ERdj4; MST049; MSTP049; DKFZP564F1862
DNAPTP6	1.17	1.53	7661597	NM_015535.1	Homo sapiens DNA polymerase-transactivated protein 6 (DNAPTP6), mRNA.		DKFZp564A2416
DTL	1.2	1.97	7705575	NM_016448.1	Homo sapiens denticleless homolog (Drosophila) (DTL), mRNA.		RAMP; L2DTL
DYNLRB1	-1.3	-1.24	29570778	NM_014183.2	Homo sapiens dynein, light chain, roadblock-type 1 (DYNLRB1), mRNA.	microtubule-based movement [goid 7018] [pmid 11750132] [evidence NAS]; retrograde axon cargo transport [goid 8090] [evidence ISS]; visual behavior [goid 7632] [evidence ISS]; microtubule motor activity [goid 3777] [pmid 11750132] [evidence NAS]; protein b	BLP; BITH; DNCL2A; DNLC2A
EMP3	-1.19	-1.61	4503562	NM_001425.1	Homo sapiens epithelial membrane protein 3 (EMP3), mRNA.	negative regulation of cell proliferation [goid 8285] [pmid 8996089] [evidence TAS]; cell growth [goid 16049] [evidence IEA]; cell death [goid 8219] [evidence NR ]; development [goid 7275] [evidence NR ]; membrane fraction [goid 5624] [evidence NR ]; memb	YMP
ENO3	-1.2	-1.66	16554590	NM_001976.2	Homo sapiens enolase 3 (beta, muscle) (ENO3), transcript variant 1, mRNA.	glycolysis [goid 6096] [evidence IEA]; lyase activity [goid 16829] [evidence IEA]; phosphopyruvate hydratase activity [goid 4634] [pmid 8513787] [evidence TAS]; magnesium ion binding [goid 287] [evidence IEA]; phosphopyruvate hydratase complex [goid 15] [	MSE
EPHA3	1.18	1.37	32967312	NM_005233.3	Homo sapiens EPH receptor A3 (EPHA3), transcript variant 1, mRNA.	signal transduction [goid 7165] [pmid 1737782] [evidence TAS]; transmembrane receptor protein tyrosine kinase signaling pathway [goid 7169] [evidence IEA]; protein amino acid phosphorylation [goid 6468] [evidence IEA]; nucleotide binding [goid 166] [evide	ETK; HEK; ETK1; HEK4; TYRO4
ETFB	-1.22	-1.36	62420878	NM_001985.2	Homo sapiens electron-transfer-flavoprotein, beta polypeptide (ETFB), transcript variant 1, mRNA.	electron transport [goid 6118] [evidence IEA]; electron transporter activity [goid 5489] [evidence IEA]; electron carrier activity [goid 9055] [pmid 7912128] [evidence TAS]; mitochondrial matrix [goid 5759] [pmid 8617498] [evidence TAS]	MADD; FP585
EYA1	1.59	1.33	26667218	NM_172059.1	Homo sapiens eyes absent homolog 1 (Drosophila) (EYA1), transcript variant 4, mRNA.	regulation of transcription, DNA-dependent [goid 6355] [evidence IEA]; sensory perception of sound [goid 7605] [pmid 9020840] [evidence TAS]; metabolism [goid 8152] [evidence IEA]; morphogenesis [goid 9653] [pmid 9020840] [evidence TAS]; transcription [go	BOP; BOR
FADS3	-1.21	-1.78	34304362	NM_021727.3	Homo sapiens fatty acid desaturase 3 (FADS3), mRNA.	fatty acid desaturation [goid 6636] [pmid 10860662] [evidence NAS]; oxidoreductase activity [goid 16491] [evidence IEA]; oxidoreductase activity, acting on paired donors, with oxidation of a pair of donors resulting in the reduction of molecular oxygen to	CYB5RP; LLCDL3; BC269730_1
FAM57A	1.18	1.43	13376161	NM_024792.1	Homo sapiens family with sequence similarity 57, member A (FAM57A), mRNA.	integral to membrane [goid 16021] [evidence IEA]	CT120; FLJ22282
FBXW7	-1.4	-1.14	61743923	NM_033632.2	Homo sapiens F-box and WD-40 domain protein 7 (archipelago homolog, Drosophila) (FBXW7), transcript variant 1, mRNA.	protein ubiquitination [goid 16567] [pmid 12354302] [evidence IDA]; protein binding [goid 5515] [pmid 12354302] [evidence IDA]; nucleus [goid 5634] [evidence IEA]	AGO; CDC4; FBW7; FBX30; FBXW6; SEL10; SEL-10; DKFZp686F23254
FLJ20512	-1.15	-1.39	8923476	NM_017854.1	Homo sapiens hypothetical protein FLJ20512 (FLJ20512), mRNA.
FST	1.19	1.28	7242221	NM_013409.1	Homo sapiens follistatin (FST), transcript variant FST344, mRNA.	negative regulation of follicle-stimulating hormone secretion [goid 46882] [evidence NAS]; development [goid 7275] [pmid 9828086] [evidence TAS]; activin inhibitor activity [goid 17106] [evidence NAS]; protein binding [goid 5515] [pmid 12697670] [evidence	FS
FZD4	1.27	1.34	22547160	NM_012193.2	Homo sapiens frizzled homolog 4 (Drosophila) (FZD4), mRNA.	G-protein coupled receptor protein signaling pathway [goid 7186] [evidence IEA]; frizzled signaling pathway [goid 7222] [pmid 10544037] [evidence TAS]; development [goid 7275] [evidence IEA]; Wnt receptor activity [goid 42813] [pmid 10544037] [evidence TA	EVR1; Fz-4; FzE4; GPCR; FZD4S; MGC34390
GADD45A	-1.26	1.29	9790904	NM_001924.2	Homo sapiens growth arrest and DNA-damage-inducible, alpha (GADD45A), mRNA.	apoptosis [goid 6915] [pmid 10828065] [evidence TAS]; regulation of cyclin dependent protein kinase activity [goid 79] [pmid 10747892] [evidence TAS]; cell cycle arrest [goid 7050] [pmid 10747892] [evidence TAS]; cell cycle [goid 7049] [evidence IEA]; DNA	DDIT1; GADD45
GEMIN4	1.17	1.25	7657121	NM_015721.1	Homo sapiens gem (nuclear organelle) associated protein 4 (GEMIN4), mRNA.	nuclear mRNA splicing, via spliceosome [goid 398] [evidence IEA]; rRNA processing [goid 6364] [pmid 10725331] [evidence TAS]; protein binding [goid 5515] [pmid 11714716] [evidence IPI]; spliceosome complex [goid 5681] [evidence IEA]; small nuclear ribonuc	HC56; HHRF-1; DKFZP434B131; DKFZP434D174
HLX1	-1.36	-3.66	19923769	NM_021958.2	Homo sapiens H2.0-like homeobox 1 (Drosophila) (HLX1), mRNA.	regulation of transcription, DNA-dependent [goid 6355] [evidence IEA]; transcription from RNA polymerase II promoter [goid 6366] [evidence NR ]; development [goid 7275] [pmid 8094082] [evidence TAS]; transcription factor activity [goid 3700] [evidence IEA	HB24
HMGCR	1.4	1.19	4557642	NM_000859.1	Homo sapiens 3-hydroxy-3-methylglutaryl-Coenzyme A reductase (HMGCR), mRNA.	lipid metabolism [goid 6629] [evidence IEA]; cholesterol biosynthesis [goid 6695] [evidence IEA]; gonad development [goid 8406] [pmid 9853754] [evidence TAS]; germ cell migration [goid 8354] [pmid 9853754] [evidence TAS]; hydroxymethylglutaryl-CoA reducta
HNRPA1	-1.38	-1.56	14043069	NM_031157.1	Homo sapiens heterogeneous nuclear ribonucleoprotein A1 (HNRPA1), transcript variant 2, mRNA.	transport [goid 6810] [evidence IEA]; mRNA processing [goid 6397] [pmid 8521471] [evidence TAS]; mRNA-nucleus export [goid 6406] [evidence IEA]; nucleotide binding [goid 166] [evidence IEA]; nucleic acid binding [goid 3676] [evidence IEA]; protein binding	HNRNPA1; MGC102835
HNRPA3	-1.29	-1.73	34740328	NM_194247.1	Homo sapiens heterogeneous nuclear ribonucleoprotein A3 (HNRPA3), mRNA.	nucleotide binding [goid 166] [evidence IEA]; RNA binding [goid 3723] [pmid 8101480] [evidence TAS]; ribonucleoprotein complex [goid 30529] [pmid 8101480] [evidence TAS]; nucleus [goid 5634] [evidence IEA]	FBRNP; D10S102; hnRNPA3; 2610510D13Rik
IFITM1	-1.37	-5.52	40254449	NM_003641.2	Homo sapiens interferon induced transmembrane protein 1 (9-27) (IFITM1), mRNA.	cell surface receptor linked signal transduction [goid 7166] [pmid 7559564] [evidence TAS]; immune response [goid 6955] [evidence IEA]; regulation of cell cycle [goid 74] [pmid 7559564] [evidence TAS]; negative regulation of cell proliferation [goid 8285]	9-27; CD225; IFI17; LEU13
IGFBP3	1.66	2	62243247	NM_001013398.1	Homo sapiens insulin-like growth factor binding protein 3 (IGFBP3), transcript variant 1, mRNA.	regulation of cell growth [goid 1558] [evidence IEA]; positive regulation of apoptosis [goid 43065] [pmid 11971816] [evidence IMP]; positive regulation of myoblast differentiation [goid 45663] [pmid 12599210] [evidence IDA]; negative regulation of signal	IBP3; BP-53
IGFBP5	-1.35	1.24	46094066	NM_000599.2	Homo sapiens insulin-like growth factor binding protein 5 (IGFBP5), mRNA.	signal transduction [goid 7165] [pmid 7525452] [evidence NAS]; regulation of cell growth [goid 1558] [evidence IEA]; insulin-like growth factor binding [goid 5520] [evidence IEA]; extracellular region [goid 5576] [pmid 14718574] [evidence NAS]	IBP5
IL24	1.23	-1.99	31317245	NM_181339.1	Homo sapiens interleukin 24 (IL24), transcript variant 2, mRNA.	immune response [goid 6955] [evidence IEA]; apoptosis [goid 6915] [pmid 9826712] [evidence TAS]; cytokine activity [goid 5125] [evidence IEA]; extracellular space [goid 5615] [evidence IEA]	C49A; FISP; MDA7; ST16; IL-24; IL10B; Mob-5; mda-7
JOSD3	1.52	2.74	13129135	NM_024116.1	Homo sapiens Josephin domain containing 3 (JOSD3), mRNA.		MGC5306
KIAA0406	1.28	1.29	24307960	NM_014657.1	Homo sapiens KIAA0406 gene product (KIAA0406), mRNA.	binding [goid 5488] [evidence IEA]
KIAA0907	1.21	1.4	55741674	NM_014949.2	Homo sapiens KIAA0907 (KIAA0907), mRNA.		RP11-336K24.1
KIAA1542	1.15	1.27	55741656	NM_020901.1	Homo sapiens CTD-binding SR-like protein rA9 (KIAA1542), mRNA.	regulation of transcription, DNA-dependent [goid 6355] [evidence IEA]; protein ubiquitination [goid 16567] [evidence IEA]; ubiquitin-protein ligase activity [goid 4842] [evidence IEA]; zinc ion binding [goid 8270] [evidence IEA]; DNA binding [goid 3677] [	PHRF1, RNF221
KIAA1600	1.3	1.27	61098051	NM_020940.2	Homo sapiens KIAA1600 (KIAA1600), mRNA.		bA106M7.3; RP11-106M7.3; DKFZp686D10123
KLHL21	1.25	1.84	55925607	NM_014851.2	Homo sapiens kelch-like 21 (Drosophila) (KLHL21), mRNA.	protein binding [goid 5515] [evidence IEA]	KIAA0469; MGC99635
KLHL9	1.29	1.42	24308180	NM_018847.1	Homo sapiens kelch-like 9 (Drosophila) (KLHL9), mRNA.	protein binding [goid 5515] [evidence IEA]	RP11-380P16.6
LEMD1	-1.31	-2.6	56676323	NM_001001552.3	Homo sapiens LEM domain containing 1 (LEMD1), mRNA.	nuclear membrane [goid 5635] [evidence IEA]	LEMP-1
LGALS1	-1.17	-1.39	6006015	NM_002305.2	Homo sapiens lectin, galactoside-binding, soluble, 1 (galectin 1) (LGALS1), mRNA.	positive regulation of I-kappaB kinase/NF-kappaB cascade [goid 43123] [pmid 12761501] [evidence IMP]; regulation of apoptosis [goid 42981] [pmid 16130169] [evidence TAS]; signal transducer activity [goid 4871] [pmid 12761501] [evidence IMP]; sugar binding	GBP
LIMK1	1.16	1.2	8051614	NM_016735.1	Homo sapiens LIM domain kinase 1 (LIMK1), transcript variant dLIMK, mRNA.	signal transduction [goid 7165] [pmid 10436159] [evidence TAS]; neurogenesis [goid 7399] [pmid 8689688] [evidence TAS]; Rho protein signal transduction [goid 7266] [pmid 10436159] [evidence TAS]; protein amino acid phosphorylation [goid 6468] [pmid 853740	LIMK
LOC493856	1.33	1.7	56605993	NM_001008388.1	Homo sapiens similar to RIKEN cDNA 1500009M05 gene (LOC493856), mRNA.
LPXN	1.21	1.8	4758669	NM_004811.1	Homo sapiens leupaxin (LPXN), mRNA.	signal transduction [goid 7165] [pmid 9565592] [evidence TAS]; protein complex assembly [goid 6461] [pmid 9565592] [evidence TAS]; cell adhesion [goid 7155] [pmid 9565592] [evidence NAS]; metal ion binding [goid 46872] [evidence IEA]; zinc ion binding [go	LDPL
MAN2B2	1.2	1.37	50659092	NM_015274.1	Homo sapiens mannosidase, alpha, class 2B, member 2 (MAN2B2), mRNA.	mannose metabolism [goid 6013] [evidence IEA]; carbohydrate metabolism [goid 5975] [evidence IEA]; hydrolase activity, acting on glycosyl bonds [goid 16798] [evidence IEA]; alpha-mannosidase activity [goid 4559] [evidence IEA]	KIAA0935
MANBA	1.35	1.83	24797157	NM_005908.2	Homo sapiens mannosidase, beta A, lysosomal (MANBA), mRNA.	protein modification [goid 6464] [pmid 9384606] [evidence NAS]; carbohydrate metabolism [goid 5975] [evidence IEA]; hydrolase activity, hydrolyzing O-glycosyl compounds [goid 4553] [evidence IEA]; beta-mannosidase activity [goid 4567] [pmid 9384606] [evid	MANB1
MAP1LC3C	-1.97	-13.73	51972259	NM_001004343.1	Homo sapiens microtubule-associated protein 1 light chain 3 gamma (MAP1LC3C), mRNA.	ubiquitin cycle [goid 6512] [evidence IEA]; autophagy [goid 6914] [evidence IEA]; membrane [goid 16020] [evidence IEA]; microtubule [goid 5874] [evidence IEA]
MAPK6	1.17	1.3	16306569	NM_002748.2	Homo sapiens mitogen-activated protein kinase 6 (MAPK6), mRNA.	signal transduction [goid 7165] [pmid 2032290] [evidence TAS]; cell cycle [goid 7049] [evidence IEA]; protein amino acid phosphorylation [goid 6468] [pmid 2032290] [evidence TAS]; nucleotide binding [goid 166] [evidence IEA]; transferase activity [goid 16	ERK3; PRKM6; p97MAPK; HsT17250; DKFZp686F03189
MAT2A	1.17	1.17	46852159	NM_005911.4	Homo sapiens methionine adenosyltransferase II, alpha (MAT2A), mRNA.	one-carbon compound metabolism [goid 6730] [evidence IEA]; potassium ion binding [goid 30955] [evidence IEA]; transferase activity [goid 16740] [evidence IEA]; nucleotide binding [goid 166] [evidence IEA]; methionine adenosyltransferase activity [goid 447	MATA2; MATII; SAMS2
MCM2	1.21	1.27	33356546	NM_004526.2	Homo sapiens MCM2 minichromosome maintenance deficient 2, mitotin (S. cerevisiae) (MCM2), mRNA.	regulation of transcription, DNA-dependent [goid 6355] [evidence IEA]; cell cycle [goid 7049] [pmid 8175912] [evidence TAS]; transcription [goid 6350] [evidence IEA]; DNA replication initiation [goid 6270] [evidence IEA]; DNA replication [goid 6260] [pmid	BM28; CCNL1; CDCL1; cdc19; D3S3194; MITOTIN; KIAA0030; MGC10606
MGC2747	1.21	1.51	34147357	NM_024104.2	Homo sapiens hypothetical protein MGC2747 (MGC2747), mRNA.
MGC33839	1.34	1.26	22748764	NM_152353.1	Homo sapiens hypothetical protein MGC33839 (MGC33839), mRNA.	membrane [goid 16020] [evidence IEA]; integral to membrane [goid 16021] [evidence IEA]
MKRN2	1.19	1.41	32880198	NM_014160.3	Homo sapiens makorin, ring finger protein, 2 (MKRN2), mRNA.	protein ubiquitination [goid 16567] [evidence IEA]; ubiquitin-protein ligase activity [goid 4842] [evidence IEA]; metal ion binding [goid 46872] [evidence IEA]; nucleic acid binding [goid 3676] [evidence IEA]; zinc ion binding [goid 8270] [evidence IEA];	RNF62; HSPC070
MRPL22	-1.26	-1.17	21265039	NM_014180.2	Homo sapiens mitochondrial ribosomal protein L22 (MRPL22), nuclear gene encoding mitochondrial protein, transcript variant 1, mRNA.	protein biosynthesis [goid 6412] [evidence IEA]; structural constituent of ribosome [goid 3735] [evidence IEA]; ribosome [goid 5840] [evidence IEA]	RPML25; HSPC158; MRP-L25; DKFZp781F1071
NAP1L4	1.19	1.22	56549646	NM_005969.3	Homo sapiens nucleosome assembly protein 1-like 4 (NAP1L4), mRNA.	nucleosome assembly [goid 6334] [pmid 9325046] [evidence TAS]; unfolded protein binding [goid 51082] [pmid 9325046] [evidence TAS]; chromatin assembly complex [goid 5678] [pmid 9325046] [evidence TAS]; cytoplasm [goid 5737] [pmid 9325046] [evidence TAS];	NAP2; NAP2L; hNAP2; MGC4565
NRCAM	1.34	1.43	41281388	NM_005010.2	Homo sapiens neuronal cell adhesion molecule (NRCAM), mRNA.	synaptogenesis [goid 7416] [pmid 8812479] [evidence TAS]; neuron migration [goid 1764] [pmid 11483367] [evidence NAS]; axonal fasciculation [goid 7413] [pmid 8812479] [evidence NAS]; central nervous system development [goid 7417] [pmid 8812479] [evidence	KIAA0343
NSUN2	1.13	1.4	39995081	NM_017755.4	Homo sapiens NOL1/NOP2/Sun domain family, member 2 (NSUN2), mRNA.		TRM4; FLJ20303
OSBPL10	1.18	1.46	23111057	NM_017784.3	Homo sapiens oxysterol binding protein-like 10 (OSBPL10), mRNA.	steroid metabolism [goid 8202] [evidence IEA]; lipid transport [goid 6869] [evidence IEA]	ORP10; OSBP9; FLJ20363
PAK6	1.55	1.43	21536446	NM_020168.3	Homo sapiens p21(CDKN1A)-activated kinase 6 (PAK6), mRNA.	protein amino acid phosphorylation [goid 6468] [evidence IEA]; protein serine/threonine kinase activity [goid 4674] [evidence IEA]; transferase activity [goid 16740] [evidence IEA]; nucleotide binding [goid 166] [evidence IEA]; ATP binding [goid 5524] [ev	PAK5
PCAF	1.39	2.12	40805842	NM_003884.3	Homo sapiens p300/CBP-associated factor (PCAF), mRNA.	regulation of transcription, DNA-dependent [goid 6355] [evidence IEA]; cell cycle arrest [goid 7050] [pmid 8684459] [evidence TAS]; cell cycle [goid 7049] [evidence IEA]; transcription [goid 6350] [evidence IEA]; negative regulation of cell proliferation	CAF; GCN5; GCN5L; P/CAF; GCN5L1
PDCD11	1.22	1.44	70980548	NM_014976.1	Homo sapiens programmed cell death 11 (PDCD11), mRNA.	apoptosis [goid 6915] [pmid 14624448] [evidence ISS]; positive regulation of I-kappaB kinase/NF-kappaB cascade [goid 43123] [pmid 14624448] [evidence ISS]; regulation of transcription, DNA-dependent [goid 6355] [pmid 14624448] [evidence ISS]; rRNA process	NFBP; ALG-4; KIAA0185
PDXK	1.19	1.3	48928052	NM_003681.3	Homo sapiens pyridoxal (pyridoxine, vitamin B6) kinase (PDXK), mRNA.	metal ion binding [goid 46872] [evidence IEA]; transferase activity [goid 16740] [evidence IEA]; nucleotide binding [goid 166] [evidence IEA]; zinc ion binding [goid 8270] [evidence IEA]; ATP binding [goid 5524] [evidence IEA]; pyridoxal kinase activity [	PKH; PNK; C21orf97
PNCK	1.38	1.37	38348220	NM_198452.1	Homo sapiens pregnancy upregulated non-ubiquitously expressed CaM kinase (PNCK), mRNA.	protein amino acid phosphorylation [goid 6468] [evidence IEA]; nucleotide binding [goid 166] [evidence IEA]; calcium- and calmodulin-dependent protein kinase activity [goid 4685] [evidence IEA]; protein kinase activity [goid 4672] [evidence IEA]; calmodul	CaMK1b; MGC45419
POLA2	1.24	1.4	20127447	NM_002689.2	Homo sapiens polymerase (DNA directed), alpha 2 (70kD subunit) (POLA2), mRNA.	DNA replication [goid 6260] [pmid 8223465] [evidence NAS]; protein binding [goid 5515] [pmid 15231747] [evidence IPI]; nucleus [goid 5634] [evidence NAS]	FLJ21662
PPFIBP1	-1.3	-1.4	29294626	NM_003622.2	Homo sapiens PTPRF interacting protein, binding protein 1 (liprin beta 1) (PPFIBP1), transcript variant 1, mRNA.	cell adhesion [goid 7155] [pmid 9624153] [evidence TAS]; protein binding [goid 5515] [pmid 9624153] [evidence TAS]; plasma membrane [goid 5886] [pmid 9624153] [evidence NAS]	L2; hSGT2; hSgt2p
PRDX5	-1.14	-1.24	32455258	NM_012094.3	Homo sapiens peroxiredoxin 5 (PRDX5), nuclear gene encoding mitochondrial protein, transcript variant 1, mRNA.	respiratory gaseous exchange [goid 7585] [pmid 10424490] [evidence TAS]; response to oxidative stress [goid 6979] [pmid 10521424] [evidence TAS]; inflammatory response [goid 6954] [pmid 10521424] [evidence TAS]; peroxidase activity [goid 4601] [evidence I	PLP; ACR1; B166; PRXV; PMP20; PRDX6; SBBI10; AOEB166; MGC117264
PRDX6	1.14	1.48	28559000	NM_004905.2	Homo sapiens peroxiredoxin 6 (PRDX6), mRNA.	phospholipid catabolism [goid 9395] [pmid 10893423] [evidence IDA]; response to oxidative stress [goid 6979] [pmid 10893423] [evidence IDA]; lipid catabolism [goid 16042] [evidence IEA]; peroxidase activity [goid 4601] [evidence IEA]; hydrolase activity [	PRX; p29; AOP2; 1-Cys; NSGPx; aiPLA2; KIAA0106; MGC46173
PRKCD	1.42	1.32	47157324	NM_212539.1	Homo sapiens protein kinase C, delta (PRKCD), transcript variant 2, mRNA.	intracellular signaling cascade [goid 7242] [evidence IEA]; protein amino acid phosphorylation [goid 6468] [pmid 8357834] [evidence TAS]; metal ion binding [goid 46872] [evidence IEA]; nucleotide binding [goid 166] [evidence IEA]; protein binding [goid 55	MAY1; MGC49908; nPKC-delta
PRR11	-1.2	-1.7	8922831	NM_018304.1	Homo sapiens proline rich 11 (PRR11), mRNA.		FLJ11029
PRSS23	1.4	3.22	38788121	NM_007173.3	Homo sapiens protease, serine, 23 (PRSS23), mRNA.	proteolysis and peptidolysis [goid 6508] [evidence IEA]; peptidase activity [goid 8233] [evidence IEA]; serine-type endopeptidase activity [goid 4252] [evidence IEA]	SIG13; SPUVE; ZSIG13; MGC5107
PSME3	1.24	1.77	30410793	NM_005789.2	Homo sapiens proteasome (prosome, macropain) activator subunit 3 (PA28 gamma; Ki) (PSME3), transcript variant 1, mRNA.	protein self binding [goid 42802] [pmid 16169070] [evidence IPI]; proteasome activator activity [goid 8538] [evidence IEA]; proteasome activator complex [goid 8537] [evidence IEA]	Ki; PA28G; REG-GAMMA; PA28-gamma
RAB13	-1.18	-1.33	34850075	NM_002870.2	Homo sapiens RAB13, member RAS oncogene family (RAB13), mRNA.	intracellular protein transport [goid 6886] [evidence IEA]; small GTPase mediated signal transduction [goid 7264] [evidence IEA]; cell adhesion [goid 7155] [pmid 8294494] [evidence TAS]; vesicle-mediated transport [goid 16192] [pmid 8294494] [evidence TAS	GIG4
RAP1GA1	1.35	1.26	4506414	NM_002885.1	Homo sapiens RAP1, GTPase activating protein 1 (RAP1GA1), mRNA.	signal transduction [goid 7165] [pmid 10476970] [evidence NAS]; GTPase activator activity [goid 5096] [pmid 1904317] [evidence TAS]; GTPase activity [goid 3924] [pmid 10476970] [evidence NAS]; membrane fraction [goid 5624] [pmid 10476970] [evidence IDA];	RAP1GAP; KIAA0474; rap1GAPII
RASL12	-1.29	-3.13	38455389	NM_016563.2	Homo sapiens RAS-like, family 12 (RASL12), mRNA.	small GTPase mediated signal transduction [goid 7264] [evidence IEA]; nucleotide binding [goid 166] [evidence IEA]; GTP binding [goid 5525] [evidence IEA]	RIS
RBM3	-1.53	-1.53	63054839	NM_001017430.1	Homo sapiens RNA binding motif (RNP1, RRM) protein 3 (RBM3), transcript variant 2, mRNA.	RNA processing [goid 6396] [pmid 8634703] [evidence TAS]; nucleotide binding [goid 166] [evidence IEA]; nucleic acid binding [goid 3676] [evidence IEA]; RNA binding [goid 3723] [pmid 8634703] [evidence TAS]	RNPL; IS1-RNPL
RGS16	-1.15	-1.24	34452689	NM_002928.2	Homo sapiens regulator of G-protein signalling 16 (RGS16), mRNA.	visual perception [goid 7601] [pmid 9469939] [evidence TAS]; negative regulation of signal transduction [goid 9968] [evidence IEA]; regulation of G-protein coupled receptor protein signaling pathway [goid 8277] [pmid 10747990] [evidence TAS]; signal trans	RGS-R; A28-RGS14; A28-RGS14P
RHOBTB3	-1.17	-1.97	41281538	NM_014899.2	Homo sapiens Rho-related BTB domain containing 3 (RHOBTB3), mRNA.	biological process unknown [goid 4] [evidence ND ]; GTPase activity [goid 3924] [pmid 12426103] [evidence NAS]; protein binding [goid 5515] [evidence IEA]	KIAA0878
RPL13A	-1.12	-1.53	14591905	NM_012423.2	Homo sapiens ribosomal protein L13a (RPL13A), mRNA.	protein biosynthesis [goid 6412] [evidence IEA]; structural constituent of ribosome [goid 3735] [pmid 10580157] [evidence TAS]; large ribosomal subunit [goid 15934] [pmid 10580157] [evidence TAS]
S100A13	-1.16	-1.25	66737366	NM_005979.2	Homo sapiens S100 calcium binding protein A13 (S100A13), transcript variant 2, mRNA.	cell differentiation [goid 30154] [evidence NAS]; calcium ion binding [goid 5509] [pmid 8878558] [evidence TAS]; cellular component unknown [goid 8372] [evidence ND ]
S100A3	-1.23	1.73	4506762	NM_002960.1	Homo sapiens S100 calcium binding protein A3 (S100A3), mRNA.	calcium ion binding [goid 5509] [evidence IEA]	S100E
SCAP	1.16	1.16	66932901	NM_012235.2	Homo sapiens SREBP cleavage-activating protein (SCAP), mRNA.	lipid metabolism [goid 6629] [evidence IEA]; steroid metabolism [goid 8202] [evidence IEA]; sterol depletion response, SREBP target gene transcriptional activation [goid 6994] [pmid 11726962] [evidence IMP]; cholesterol metabolism [goid 8203] [evidence IE	KIAA0199
SDF2	1.16	1.59	14141194	NM_006923.2	Homo sapiens stromal cell-derived factor 2 (SDF2), mRNA.	protein amino acid glycosylation [goid 6486] [pmid 8918255] [evidence TAS]; dolichyl-phosphate-mannose-protein mannosyltransferase activity [goid 4169] [pmid 8918255] [evidence TAS]; extracellular space [goid 5615] [pmid 8918255] [evidence TAS]; membrane
SH3D19	1.42	1.54	62751804	NM_001009555.2	Homo sapiens SH3 domain protein D19 (SH3D19), mRNA.		EVE1; MGC105136
SKP1A	1.17	1.8	25777712	NM_170679.1	Homo sapiens S-phase kinase-associated protein 1A (p19A) (SKP1A), transcript variant 2, mRNA.	ubiquitin cycle [goid 6512] [evidence IEA]; protein binding [goid 5515] [pmid 14743216] [evidence IPI]	OCP2; SKP1; EMC19; OCP-II; TCEB1L; MGC34403
SLC1A4	1.74	2.74	21314631	NM_003038.2	Homo sapiens solute carrier family 1 (glutamate/neutral amino acid transporter), member 4 (SLC1A4), mRNA.	transport [goid 6810] [evidence IEA]; neutral amino acid transport [goid 15804] [pmid 8910405] [evidence TAS]; dicarboxylic acid transport [goid 6835] [evidence IEA]; sodium:dicarboxylate symporter activity [goid 17153] [evidence IEA]; neutral amino acid	SATT; ASCT1
SLC35E1	1.19	1.45	40255010	NM_024881.3	Homo sapiens solute carrier family 35, member E1 (SLC35E1), mRNA.	transport [goid 6810] [evidence IEA]; membrane [goid 16020] [evidence IEA]; integral to membrane [goid 16021] [evidence IEA]	FLJ14251; MGC44954
SMARCC1	1.13	1.15	21237801	NM_003074.2	Homo sapiens SWI/SNF related, matrix associated, actin dependent regulator of chromatin, subfamily c, member 1 (SMARCC1), mRNA.	positive regulation of transcription, DNA-dependent [goid 45893] [pmid 11018012] [evidence IDA]; regulation of transcription from RNA polymerase II promoter [goid 6357] [pmid 8804307] [evidence TAS]; regulation of transcription [goid 45449] [evidence IEA]	Rsc8; SRG3; SWI3; BAF155; CRACC1
SMARCD3	-1.21	-2.15	51477705	NM_003078.3	Homo sapiens SWI/SNF related, matrix associated, actin dependent regulator of chromatin, subfamily d, member 3 (SMARCD3), transcript variant 2, mRNA.	positive regulation of transcription, DNA-dependent [goid 45893] [pmid 14701856] [evidence IDA]; transcription [goid 6350] [evidence IEA]; regulation of transcription from RNA polymerase II promoter [goid 6357] [pmid 8804307] [evidence TAS]; chromatin rem	Rsc6p; BAF60C; CRACD3; MGC111010
SNAPC4	1.16	1.38	4507106	NM_003086.1	Homo sapiens small nuclear RNA activating complex, polypeptide 4, 190kDa (SNAPC4), mRNA.	transcription from RNA polymerase III promoter [goid 6383] [pmid 9418884] [evidence TAS]; snRNA transcription [goid 9301] [pmid 9418884] [evidence TAS]; transcription from RNA polymerase II promoter [goid 6366] [pmid 9418884] [evidence TAS]; regulation of	SNAP190; FLJ13451; PTFalpha
SNRPB2	1.34	1.26	38149917	NM_003092.3	Homo sapiens small nuclear ribonucleoprotein polypeptide B'' (SNRPB2), transcript variant 1, mRNA.	nuclear mRNA splicing, via spliceosome [goid 398] [evidence IEA]; RNA splicing [goid 8380] [pmid 2951739] [evidence TAS]; nucleotide binding [goid 166] [evidence IEA]; RNA binding [goid 3723] [evidence IEA]; snRNP U2 [goid 5686] [pmid 2951739] [evidence T	MGC24807; MGC45309
SPG7	1.19	1.47	40806171	NM_003119.2	Homo sapiens spastic paraplegia 7, paraplegin (pure and complicated autosomal recessive) (SPG7), nuclear gene encoding mitochondrial protein, transcript variant 1, mRNA.	signal transduction [goid 7165] [pmid 9405655] [evidence NAS]; protein catabolism [goid 30163] [evidence IEA]; cell adhesion [goid 7155] [pmid 1560826] [evidence TAS]; neurogenesis [goid 7399] [pmid 9635427] [evidence TAS]; regulation of cell adhesion [go	CAR; PGN; CMAR; MGC126331; MGC126332
SPP1	-1.65	-2.05	38146097	NM_000582.2	Homo sapiens secreted phosphoprotein 1 (osteopontin, bone sialoprotein I, early T-lymphocyte activation 1) (SPP1), mRNA.	cell-matrix adhesion [goid 7160] [evidence NAS]; cell adhesion [goid 7155] [evidence IEA]; induction of positive chemotaxis [goid 50930] [pmid 1107524] [evidence TAS]; ossification [goid 1503] [pmid 10766759] [evidence TAS]; regulation of myeloid cell dif	OPN; BNSP; BSPI; ETA-1; MGC110940
SRXN1	1.2	1.45	22129777	NM_080725.1	Homo sapiens sulfiredoxin 1 homolog (S. cerevisiae) (SRXN1), mRNA.	response to oxidative stress [goid 6979] [pmid 15448164] [evidence IDA]; nucleotide binding [goid 166] [evidence IEA]; oxidoreductase activity, acting on sulfur group of donors [goid 16667] [pmid 15448164] [evidence IDA]; magnesium ion binding [goid 287]	Npn3; SRX1; YKL086W; C20orf139; dJ850E9.2
SSSCA1	-1.22	-1.63	5453837	NM_006396.1	Homo sapiens Sjogren's syndrome/scleroderma autoantigen 1 (SSSCA1), mRNA.	cell division [goid 51301] [evidence IEA]; mitosis [goid 7067] [pmid 9486406] [evidence TAS]; cell cycle [goid 7049] [evidence IEA]	p27
STK25	1.16	1.2	34147665	NM_006374.3	Homo sapiens serine/threonine kinase 25 (STE20 homolog, yeast) (STK25), mRNA.	signal transduction [goid 7165] [pmid 8887545] [evidence TAS]; protein amino acid phosphorylation [goid 6468] [evidence IEA]; response to oxidative stress [goid 6979] [pmid 8887545] [evidence TAS]; protein serine/threonine kinase activity [goid 4674] [evi	SOK1; YSK1; DKFZp686J1430
STK36	1.18	1.19	34222107	NM_015690.2	Homo sapiens serine/threonine kinase 36 (fused homolog, Drosophila) (STK36), mRNA.	protein amino acid phosphorylation [goid 6468] [evidence NAS]; protein serine/threonine kinase activity [goid 4674] [evidence NAS]; transferase activity [goid 16740] [evidence IEA]; nucleotide binding [goid 166] [evidence IEA]; binding [goid 5488] [eviden	FU; KIAA1278; DKFZp434N0223
SYNJ2BP	1.22	1.65	8922963	NM_018373.1	Homo sapiens synaptojanin 2 binding protein (SYNJ2BP), mRNA.	protein binding [goid 5515] [evidence IEA]; mitochondrion [goid 5739] [evidence IEA]; integral to membrane [goid 16021] [evidence IEA]; outer membrane [goid 19867] [evidence IEA]	Arip2; OMP25; FLJ11271
TAGLN3	1.25	3.36	56549138	NM_001008273.1	Homo sapiens transgelin 3 (TAGLN3), transcript variant 3, mRNA.	central nervous system development [goid 7417] [pmid 8015377] [evidence TAS]; muscle development [goid 7517] [evidence IEA]	NP22; NP25
TBC1D14	1.23	1.24	29789113	NM_020773.1	Homo sapiens TBC1 domain family, member 14 (TBC1D14), mRNA.	GTPase activator activity [goid 5096] [evidence IEA]	KIAA1322
TCFL5	1.21	1.36	38505158	NM_006602.2	Homo sapiens transcription factor-like 5 (basic helix-loop-helix) (TCFL5), mRNA.	regulation of transcription, DNA-dependent [goid 6355] [pmid 9763657] [evidence IDA]; regulation of cell differentiation [goid 45595] [pmid 9763657] [evidence IEP]; transcription from RNA polymerase II promoter [goid 6366] [pmid 9763657] [evidence TAS]; r	CHA; E2BP-1; MGC46135
TIPARP	1.4	1.37	38524593	NM_015508.2	Homo sapiens TCDD-inducible poly(ADP-ribose) polymerase (TIPARP), mRNA.	protein amino acid ADP-ribosylation [goid 6471] [evidence IEA]; NAD+ ADP-ribosyltransferase activity [goid 3950] [evidence IEA]; nucleic acid binding [goid 3676] [evidence IEA]; protein binding [goid 5515] [pmid 15231747] [evidence IPI]; nucleus [goid 563	DDF1; PARP7; PARP-1; PARP-7; DKFZP434J214; DKFZp686N0351; DKFZp686P1838
TMEM2	1.48	2.59	7019554	NM_013390.1	Homo sapiens transmembrane protein 2 (TMEM2), mRNA.	integral to membrane [goid 16021] [pmid 10767548] [evidence TAS]
TMEM30A	1.18	1.33	52694667	NM_018247.2	Homo sapiens transmembrane protein 30A (TMEM30A), mRNA.	molecular function unknown [goid 5554] [evidence IEA]; membrane [goid 16020] [evidence IEA]	CDC50A; C6orf67; FLJ10856
TMEPAI	1.41	2.15	40317615	NM_199169.1	Homo sapiens transmembrane, prostate androgen induced RNA (TMEPAI), transcript variant 2, mRNA.	androgen receptor signaling pathway [goid 30521] [pmid 10873380] [evidence NAS]; molecular function unknown [goid 5554] [evidence ND ]; integral to membrane [goid 16021] [pmid 10873380] [evidence NAS]	STAG1; PMEPA1
TNNT1	-1.18	-3.5	39930526	NM_003283.3	Homo sapiens troponin T type 1 (skeletal, slow) (TNNT1), mRNA.	regulation of muscle contraction [goid 6937] [pmid 8135831] [evidence TAS]; muscle development [goid 7517] [evidence IEA]; tropomyosin binding [goid 5523] [pmid 8135831] [evidence TAS]	ANM
TOR1A	1.16	1.36	56550122	NM_000113.2	Homo sapiens torsin family 1, member A (torsin A) (TOR1A), mRNA.	protein folding [goid 6457] [pmid 9288096] [evidence TAS]; response to unfolded protein [goid 6986] [pmid 9288096] [evidence TAS]; chaperone cofactor dependent protein folding [goid 51085] [evidence IEA]; nucleotide binding [goid 166] [evidence IEA]; endo	DQ2; DYT1; torsin A
TPI1	-1.14	-1.22	52851446	NM_000365.4	Homo sapiens triosephosphate isomerase 1 (TPI1), mRNA.	fatty acid biosynthesis [goid 6633] [evidence IEA]; metabolism [goid 8152] [evidence IEA]; gluconeogenesis [goid 6094] [evidence IEA]; pentose-phosphate shunt [goid 6098] [evidence IEA]; glycolysis [goid 6096] [evidence IEA]; triose-phosphate isomerase ac	TPI; MGC88108
TTC17	1.2	1.28	41055004	NM_018259.3	Homo sapiens tetratricopeptide repeat domain 17 (TTC17), mRNA.	binding [goid 5488] [evidence IEA]	FLJ10890; FLJ13099; DKFZp686D20222
TTLL12	1.27	1.33	57617038	NM_015140.2	Homo sapiens tubulin tyrosine ligase-like family, member 12 (TTLL12), mRNA.	protein modification [goid 6464] [evidence IEA]; tubulin-tyrosine ligase activity [goid 4835] [evidence IEA]; ligase activity [goid 16874] [evidence IEA]	KIAA0153
UBE2F	1.23	1.29	18087856	NM_080678.1	Homo sapiens ubiquitin-conjugating enzyme E2F (putative) (UBE2F), mRNA.	ubiquitin cycle [goid 6512] [evidence IEA]; ubiquitin-like activating enzyme activity [goid 8642] [evidence IEA]; ligase activity [goid 16874] [evidence IEA]	NCE2; MGC18120
UHRF1	1.2	1.47	16507203	NM_013282.2	Homo sapiens ubiquitin-like, containing PHD and RING finger domains, 1 (UHRF1), mRNA.	regulation of transcription, DNA-dependent [goid 6355] [evidence IEA]; cell cycle [goid 7049] [evidence IEA]; protein ubiquitination [goid 16567] [evidence IEA]; transcription [goid 6350] [evidence IEA]; DNA repair [goid 6281] [evidence IEA]; metal ion bi	Np95; ICBP90; RNF106; huNp95; FLJ21925
WBP5	-1.33	-1.31	55743146	NM_001006614.1	Homo sapiens WW domain binding protein 5 (WBP5), transcript variant 4, mRNA.
WDR42A	1.15	1.2	30089953	NM_015726.2	Homo sapiens WD repeat domain 42A (WDR42A), mRNA.		H326; FLJ35857; MGC99640; MGC118891; DKFZp781G1096
YIF1B	-1.23	-1.28	72534755	NM_001031731.1	Homo sapiens Yip1 interacting factor homolog B (S. cerevisiae) (YIF1B), transcript variant 1, mRNA.		FinGER8
YY1	1.16	1.14	21464104	NM_003403.3	Homo sapiens YY1 transcription factor (YY1), mRNA.	transcription [goid 6350] [evidence IEA]; regulation of transcription from RNA polymerase II promoter [goid 6357] [pmid 1655281] [evidence TAS]; antimicrobial humoral response (sensu Vertebrata) [goid 19735] [pmid 1946405] [evidence TAS]; metal ion bindin	DELTA; NF-E1; UCRBP; YIN-YANG-1
